# Supplementary material for: Blimp1+ cells generate functional mouse sebaceous gland organoids in vitro
Source: PubMed Central journal article supplement (PMC6538623; doi:10.1038/s41467-019-10261-6), 2019-05-28
Supplement: 41467_2019_10261_MOESM1_ESM.pdf [file 41467_2019_10261_MOESM1_ESM.pdf]

## **Supplementary Information**

**Blimp1<sup>+</sup> cells generate functional mouse  
sebaceous gland organoids *in vitro***

Feldman *et al.*

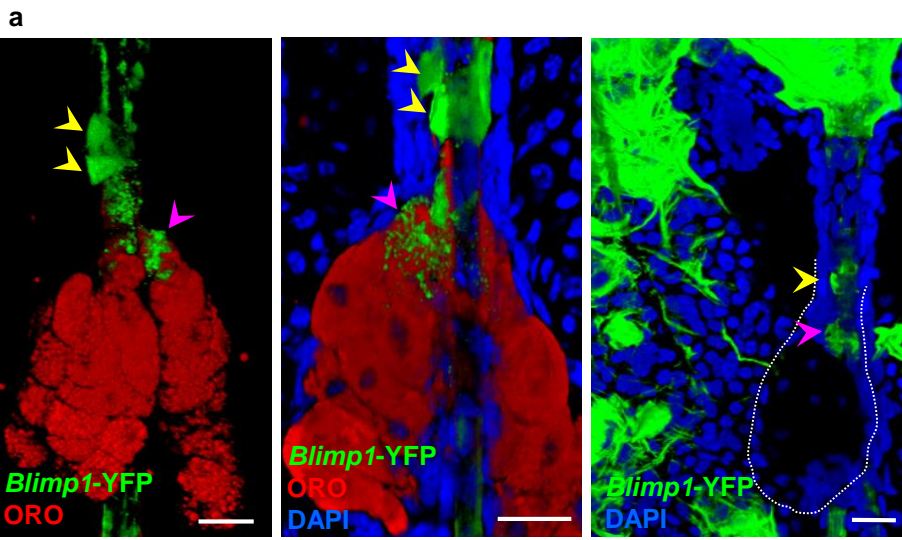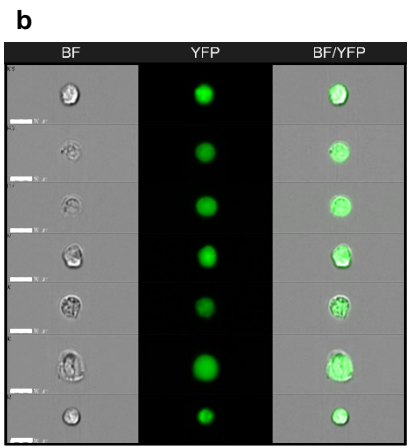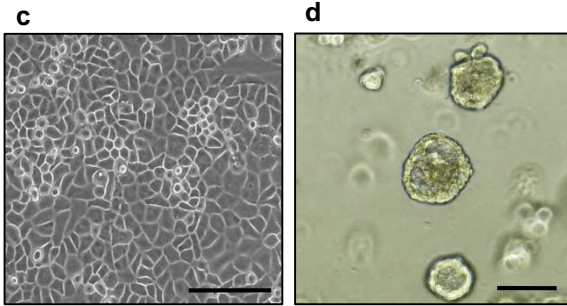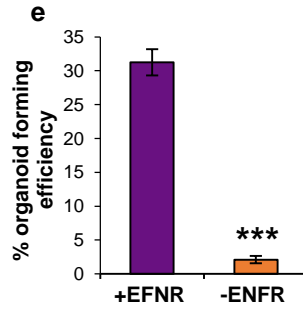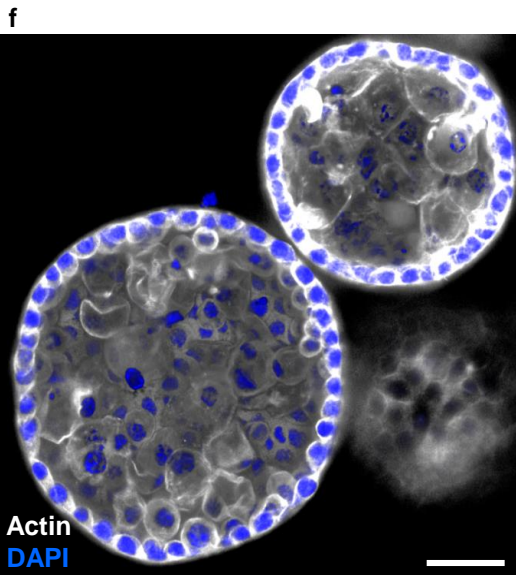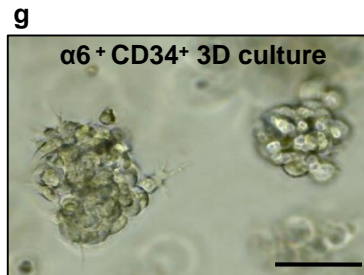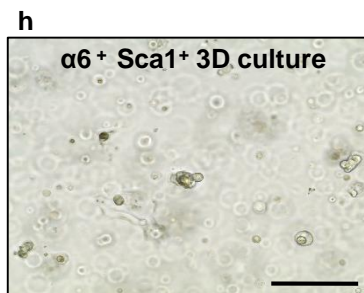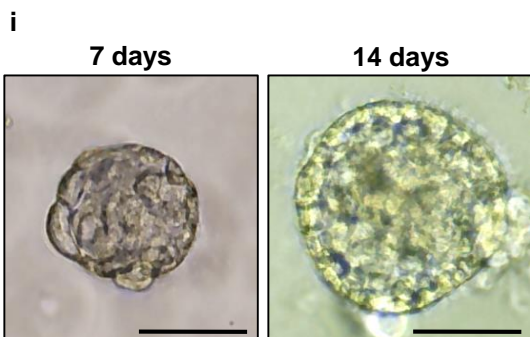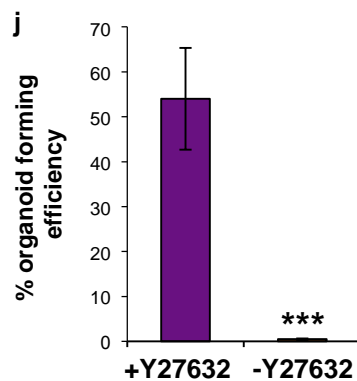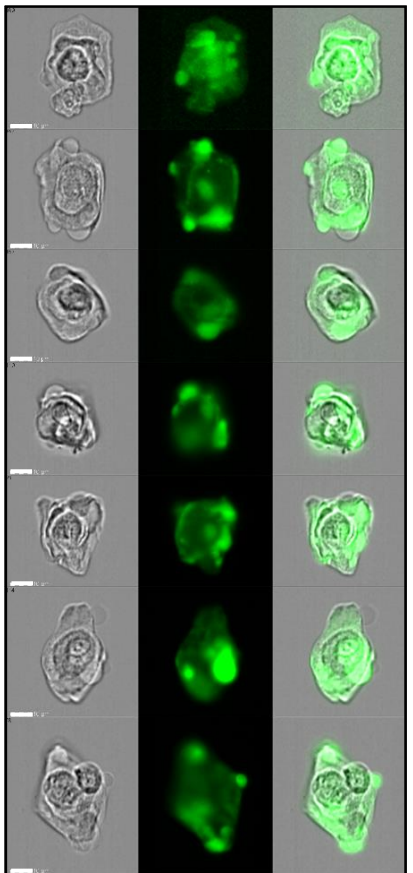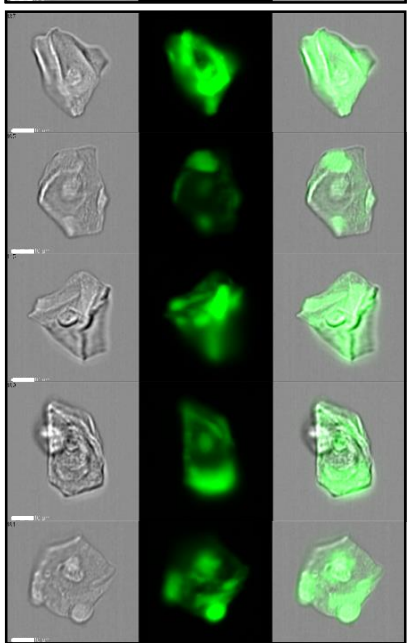

**Supplementary Figure 1. *Blimp1*-YFP<sup>+</sup> cells can generate a sebaceous gland-resembling structure in 3D culture.** (a) Representative images of dorsal skin whole-mount extracted from P56 (telogenic)-old *B6.Cg-Tg(Prdm1-EYFP)1Mnz/J* (denoted *Blimp1*-YFP) reporter mouse stained for Oil Red O (ORO) shows *Blimp1*-YFP<sup>+</sup> expression at the base of the sebaceous gland (SG; yellow arrows), in mature sebocytes (pink arrow), and differentiated keratinocytes in the interfollicular epidermis [ $n = 3$  mice]. (b) Representative ImageStream analysis showing brightfield (BF) images of single *Blimp1*-YFP<sup>+</sup> cells, indicating that these cells display three distinct morphologies: 1) small cells with high circularity, 2) large cells resembling sebocytes and 3) differentiated keratinocytes. (c) 2D culture of  $\alpha 6^{+};Scal^{+};Blimp1$ -EYFP<sup>+</sup> cells at passage 10 [ $n = 3$  pooled mice]. (d) 3D culture of  $\alpha 6^{+};Scal^{+};Blimp1$ -EYFP<sup>+</sup> cell-derived organoids grown in Matrigel without supplemented EGF, FGF, Noggin and R-spondin (EFNR) medium. (e) Organoid forming efficiency of cultured  $\alpha 6^{+};Scal^{+};Blimp1$ -EYFP<sup>+</sup> cells, grown in the presence or absence of EFNR media. (f) 3D-reconstructed confocal image of a cross-section obtained from a day 10 organoid, stained for actin. (g, h) 3D culture of (g)  $\alpha 6^{+};CD34^{+}$  and (h)  $\alpha 6^{+};Scal^{+}$  cells in Matrigel. (i) 3D culture of isolated  $\alpha 6^{+};Scal^{+};Blimp1$ -EYFP<sup>+</sup> cells directly seeded in Matrigel, supplemented with EFNR and ROCK inhibitor Y-27632 after 7 and 14 days. (j) Organoid forming efficiency from isolated  $\alpha 6^{+};Scal^{+};Blimp1$ -EYFP<sup>+</sup> cells directly seeded in Matrigel, supplemented with EFNR and grown in the presence or absence of ROCK inhibitor Y-27632. All organoids images are representative of a mix of at least three mice, cultured in three independent biological repeats. Experiments were repeated at least twice with similar results. Error bars represent  $\pm$ s.e.m. \*\*\* $p < 0.001$  was determined using two-tailed, unpaired Student's  $t$  test. Scale bars: 10 $\mu$ m (b), 20 $\mu$ m (a) 50 $\mu$ m (c, d, f-i).

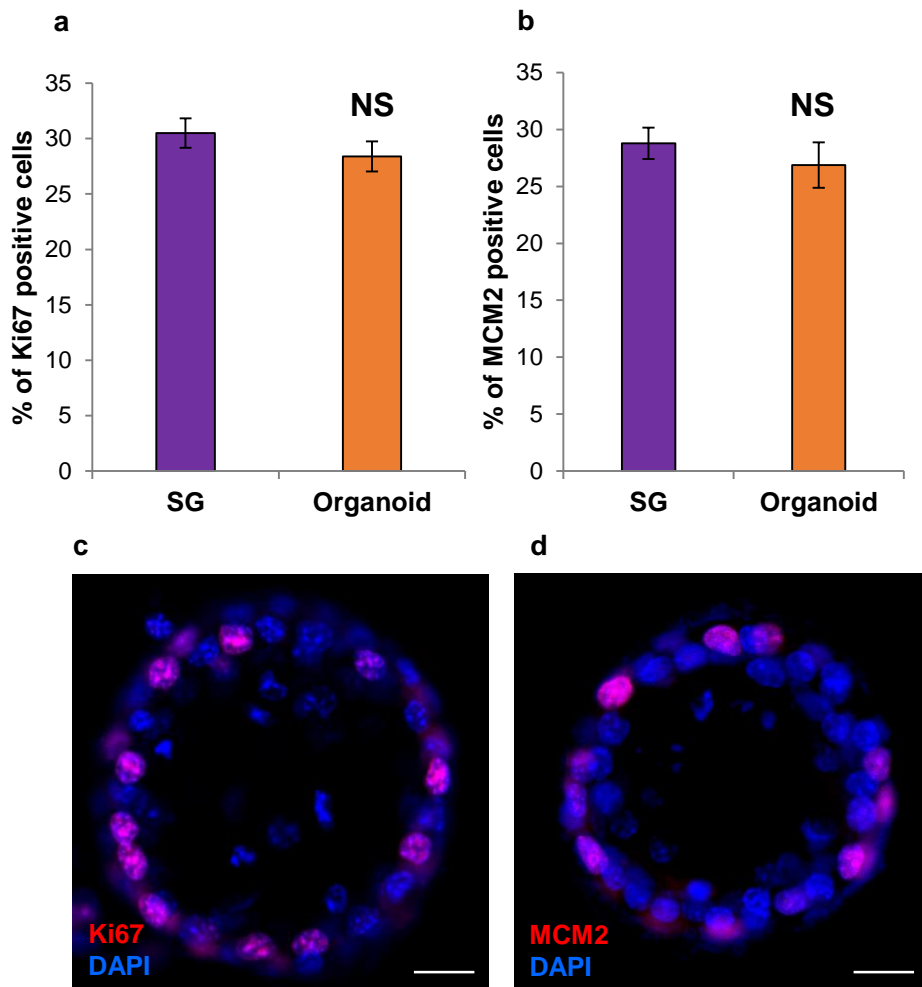

**Supplementary Figure 2. Proliferation in sebaceous glands and *Blimp1*-YFP<sup>+</sup> cell-derived organoids.** (a, b) Percentages of (a) Ki67<sup>+</sup> and (b) MCM2<sup>+</sup> cells in sebaceous glands (SGs) of P56 (telogenic)-old wild type mice and *Blimp1*-YFP<sup>+</sup> cell-derived organoids that were cultured for 10 days. Error bars represent  $\pm$ s.e.m [ $n = 3$  mice or 60 individual organoids from three independent wells]. NS indicates no significance as determined by two-tailed, unpaired Student's *t* test. (b, c) Representative images of cross-section of 10-day-old organoid stained with (a) Ki67 and (b) MCM2, showing proliferating cells only on the outer organoid layer. Experiments were repeated at least three times with similar results. Scale bars: 20 $\mu$ m (c, d).



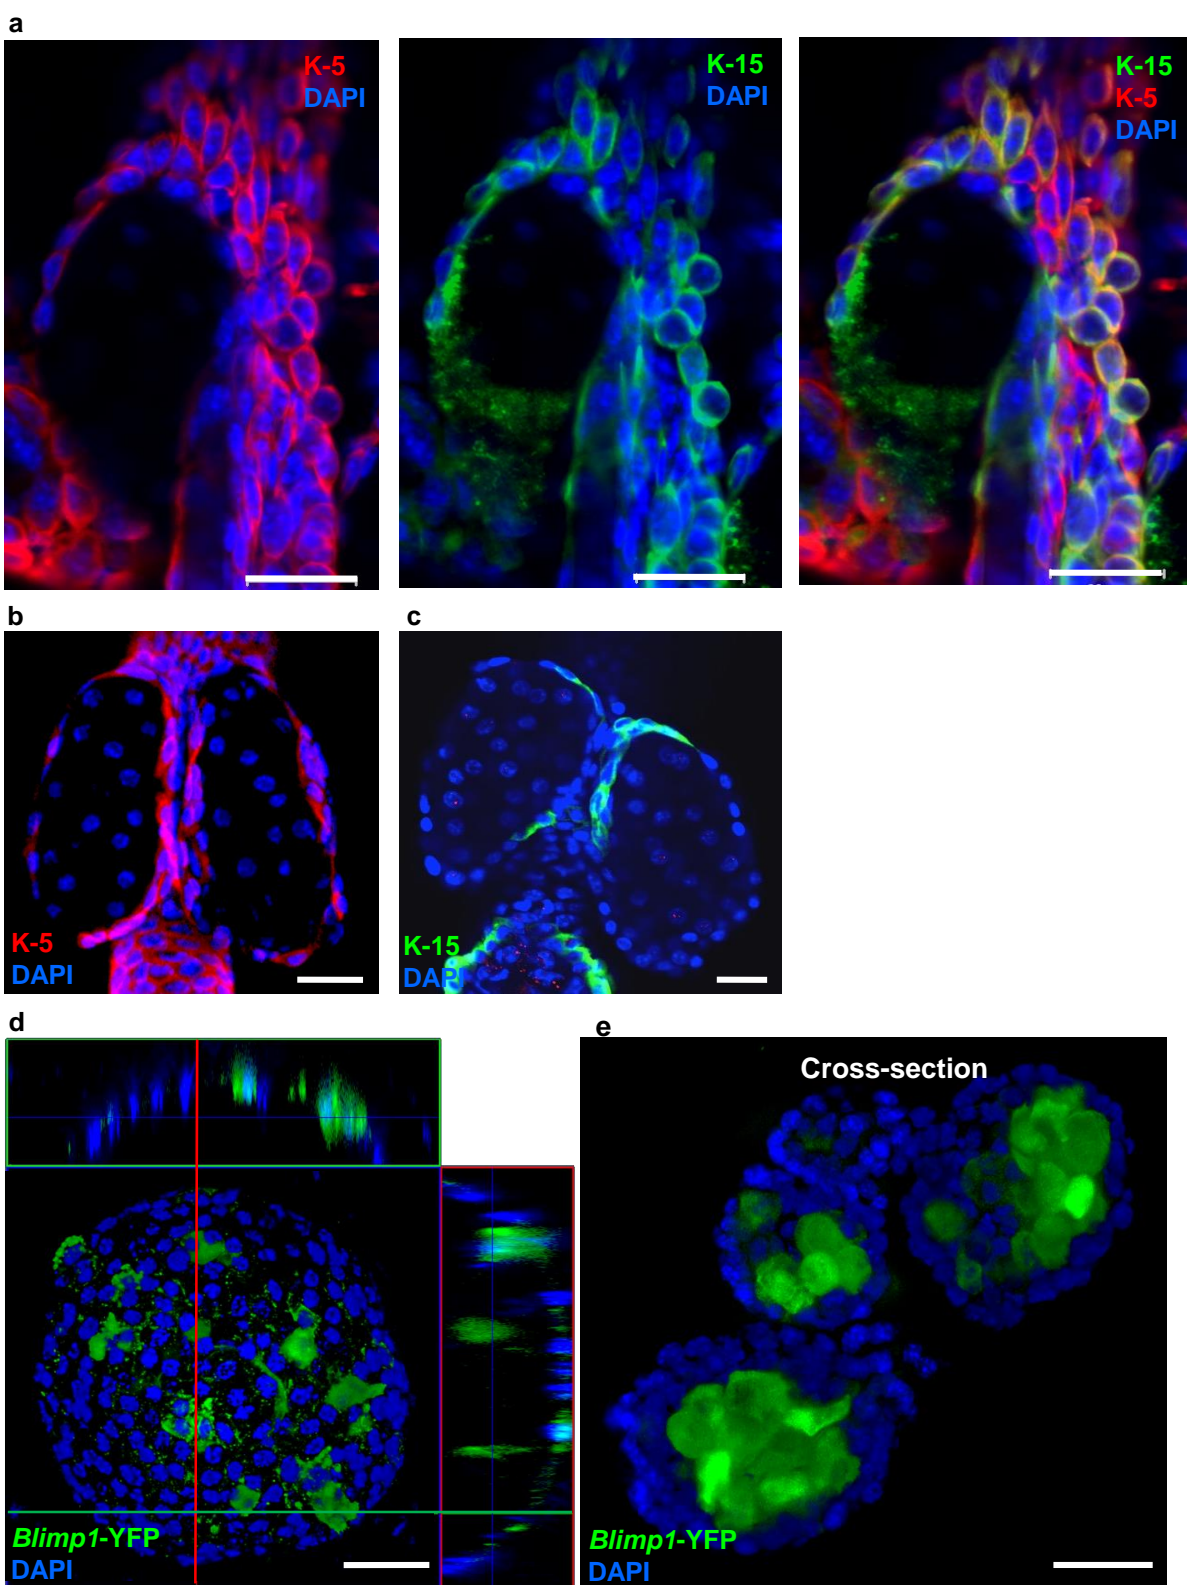

**Supplementary Figure 3. Expression of sebaceous gland markers in sebaceous glands and organoids.** (a) Dorsal skin whole mount extracted from P56 (telogenic)-old wild type (WT) mouse stained for keratin (K)-5 and K-15. (b, c) Tail skin wholemount extracted from P56 (telogenic)-old WT mouse stained for (b) K-5 and (c) K-15. (d, e) Confocal images of *Blimp1*-YFP<sup>+</sup>-cell derived organoids cultured for 10 days, showing (d) *Blimp1*-YFP<sup>+</sup> cells in the outer layer and (e) in the inner compartment as shown in an organoid cross-section. All images are representative of three mice or organoids derived from three pooled mice cultured in triplicates. Experiments were repeated at least three times with similar results. Scale bars: 20 $\mu$ m (a-c), 50 $\mu$ m (d, e).

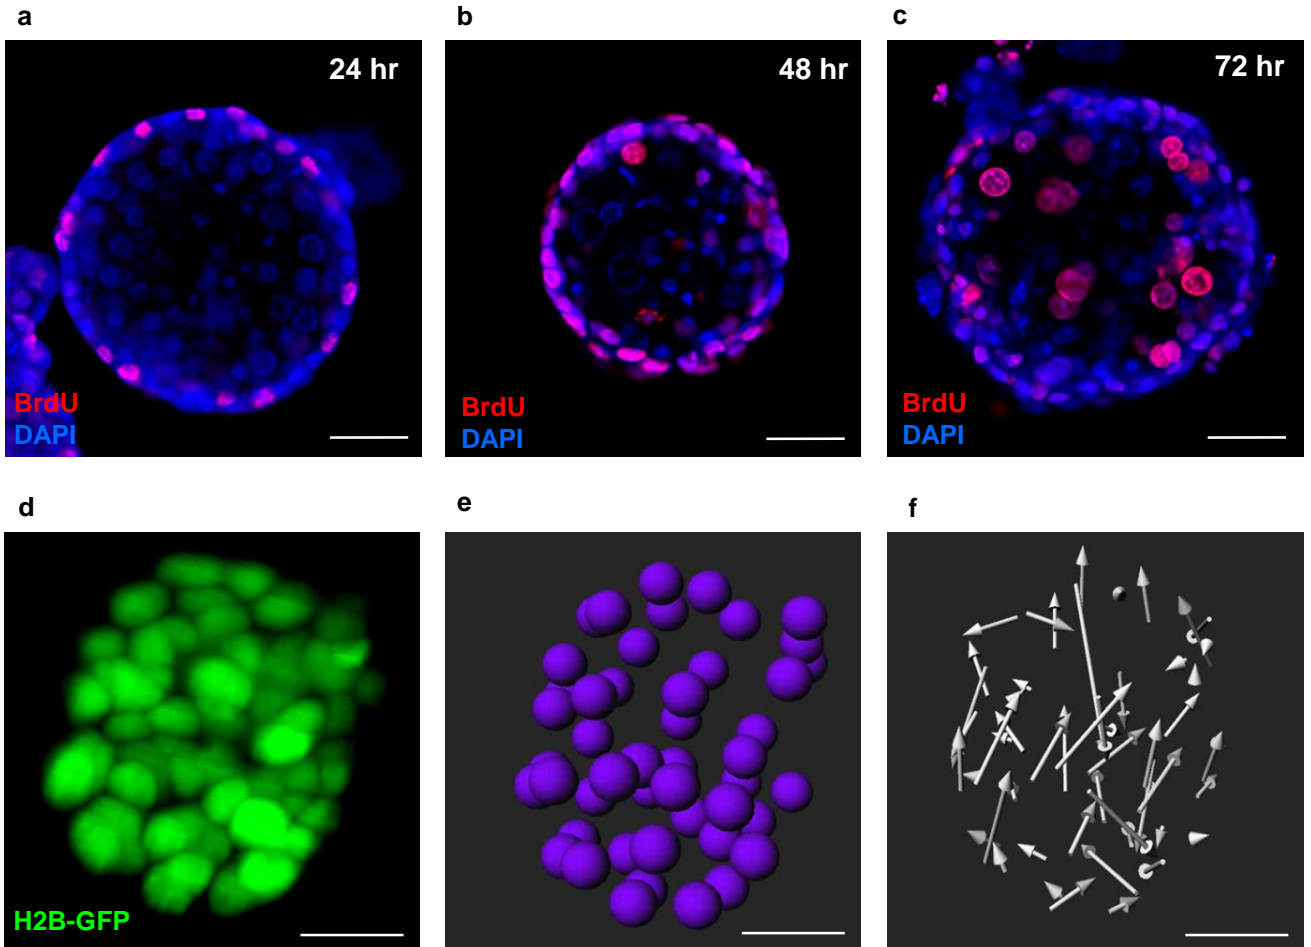

**Supplementary Figure 4. Analysis of cell dynamics in sebaceous gland organoids.** (a-c) 5-Bromo-2'-deoxyuridine (BrdU) pulse-chase analysis in 7-day-old *Blimp1*-YFP<sup>+</sup> cell-derived organoids, chased over (a) 24 hours, (b) 48 hours and (c) 72 hours. Cross-sections revealing the migration of BrdU-labeled cells from the outer layer to the inner non-proliferating mass. (d) Light sheet fluorescence microscopy image of representative *Blimp1*-YFP-H2B-GFP<sup>+</sup> (nuclear labeled) cell-derived organoid grown for 7 days. (e) Analysis of cell movement was performed and each nucleus is marked as a spheroid. (f) Spatial movement was tracked and is represented as a vector. All images are representative of organoids derived from three pooled mice cultured in triplicates. Experiments were repeated at least three times in triplicates with similar results. Scale bars: 20 $\mu$ m (d-f), 50 $\mu$ m (a-c).

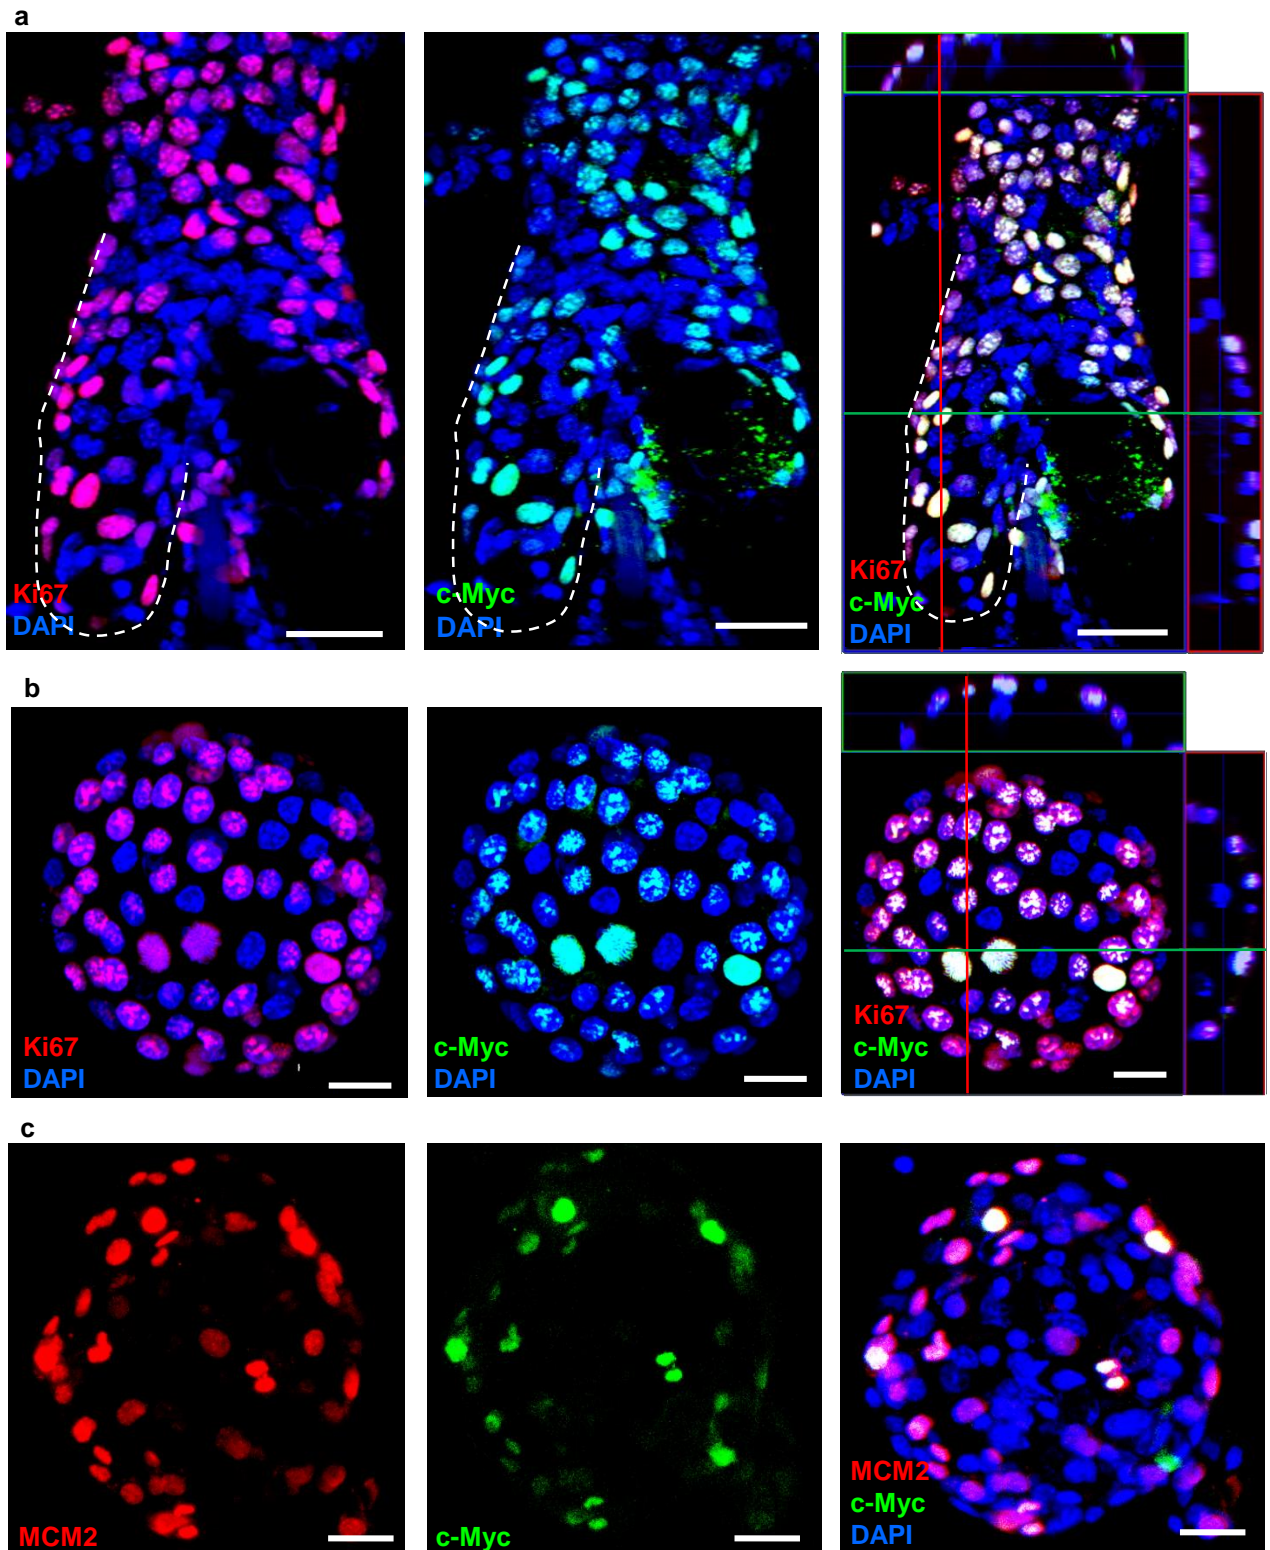

**Supplementary Figure 5. c-Myc expression in proliferative cells is recapitulated in organoids.** (a) Representative images of dorsal skin whole mount extracted from P56 (telogenic)-old wild type (WT) mouse stained for Ki67 and c-Myc [ $n = 3$  mice]. (b, c) Representative images of *Blimp1*-YFP<sup>+</sup> cell-derived organoids cultured for 10 days, stained for (b) Ki67 and c-Myc and (c) MCM2 and c-Myc. Organoids were grown from three pooled mice and cultured in triplicates. Experiments were repeated at least twice with similar results. Scale bars: 20 $\mu$ m (a-c).



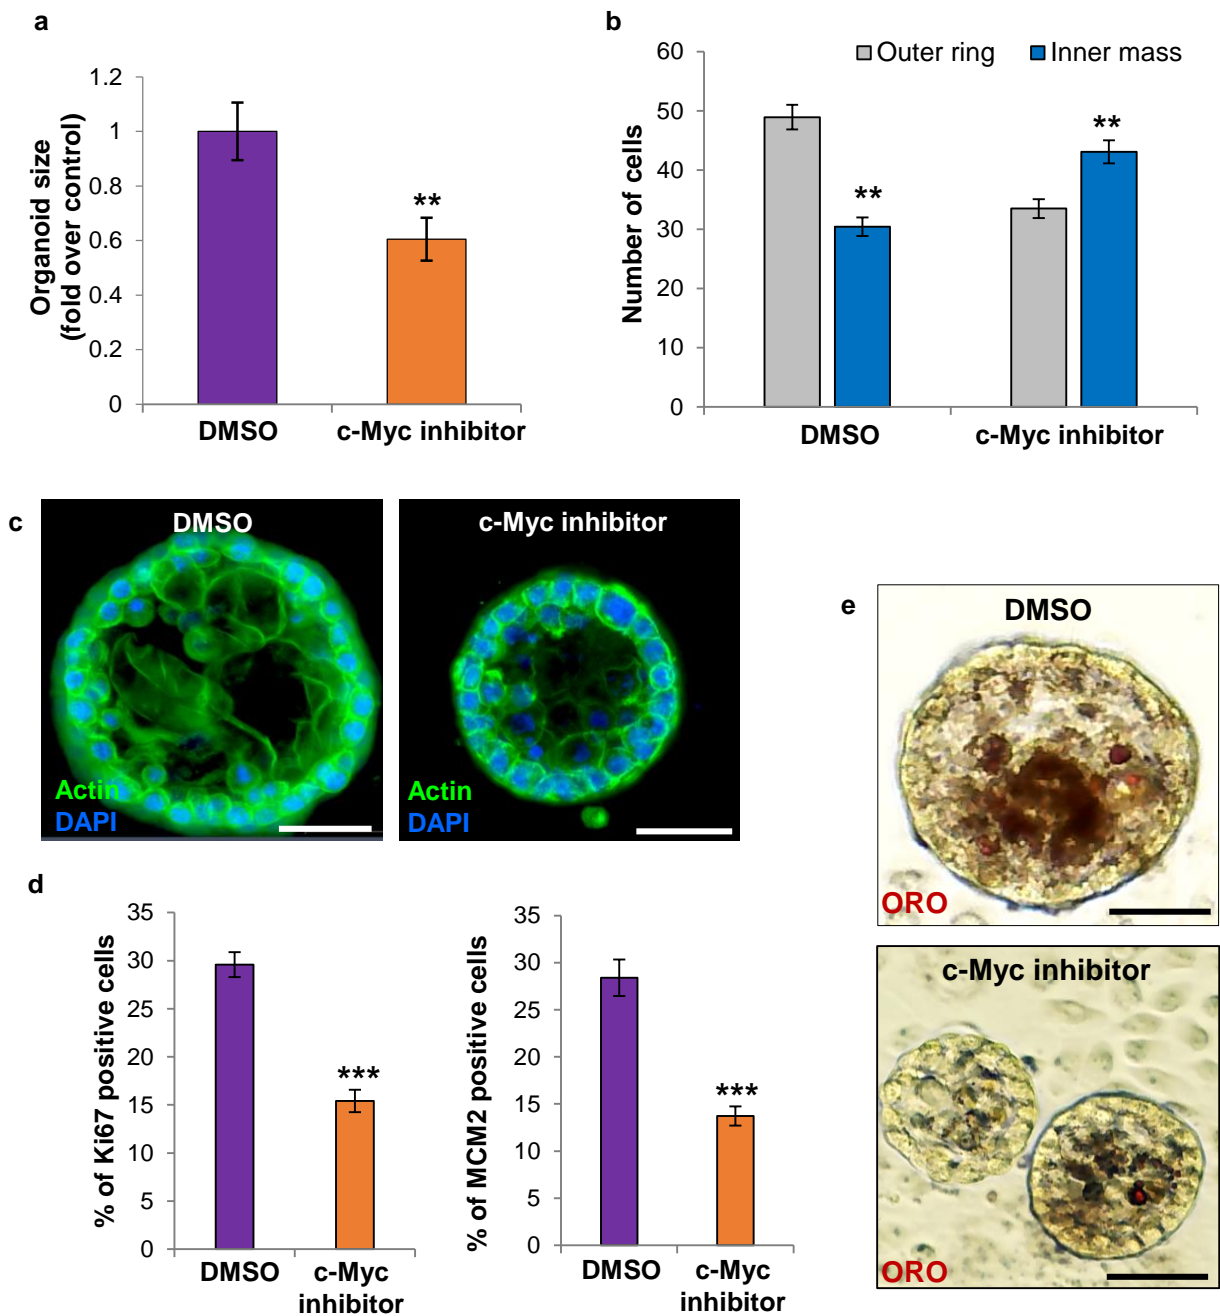

**Supplementary Figure 6. c-Myc regulates proliferation and differentiation in the *Blimp1*-YFP<sup>+</sup> cell-derived organoid.** (a, b) *Blimp1*-YFP<sup>+</sup> cell-derived organoids cultured for six days and treated for four days with c-Myc inhibitor (10058-F4) or DMSO as control. (a) Organoid size in treated organoids compared to control organoids ( $n=150$  organoids). (b) Cell number in the outer layer and inner mass of control and treated organoids ( $n=60$ ). (c) Cross-section of control and treated organoids stained for actin. (d) Percentage of proliferating cells, as marked by Ki67 and MCM2, per control or treated organoid ( $n=60$ ). (e) Control and treated organoids stained for Oil Red O (ORO). Data is represented as the mean and error bars show  $\pm$ s.e.m relative to control organoids. \*\* $p<0.005$  and \*\*\* $p<0.001$  were determined using two-tailed, unpaired Student's  $t$  test. All images are representative of organoids derived from three pooled mice cultured in triplicates and experiments were repeated at least three times with similar results. Scale bars: 50 $\mu$ m (c, e).



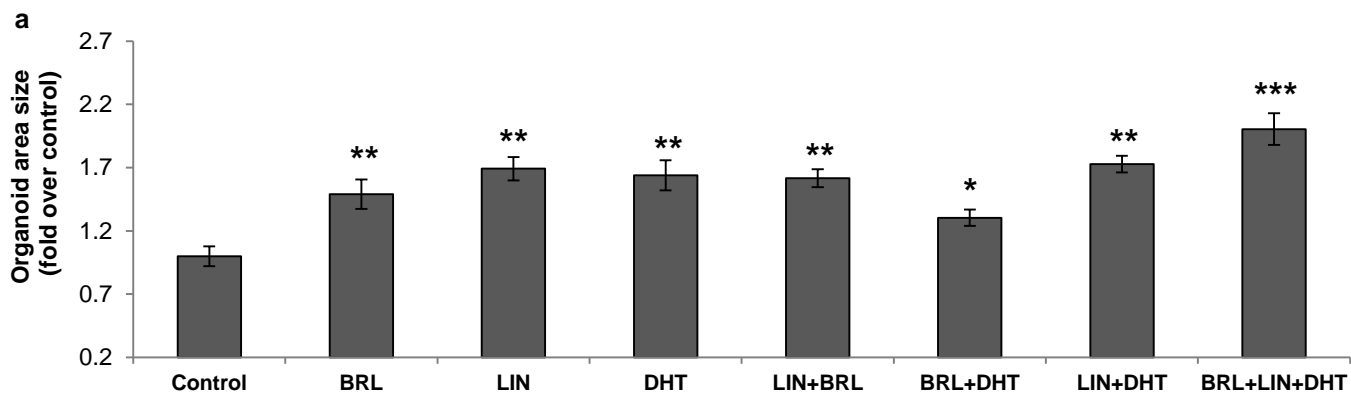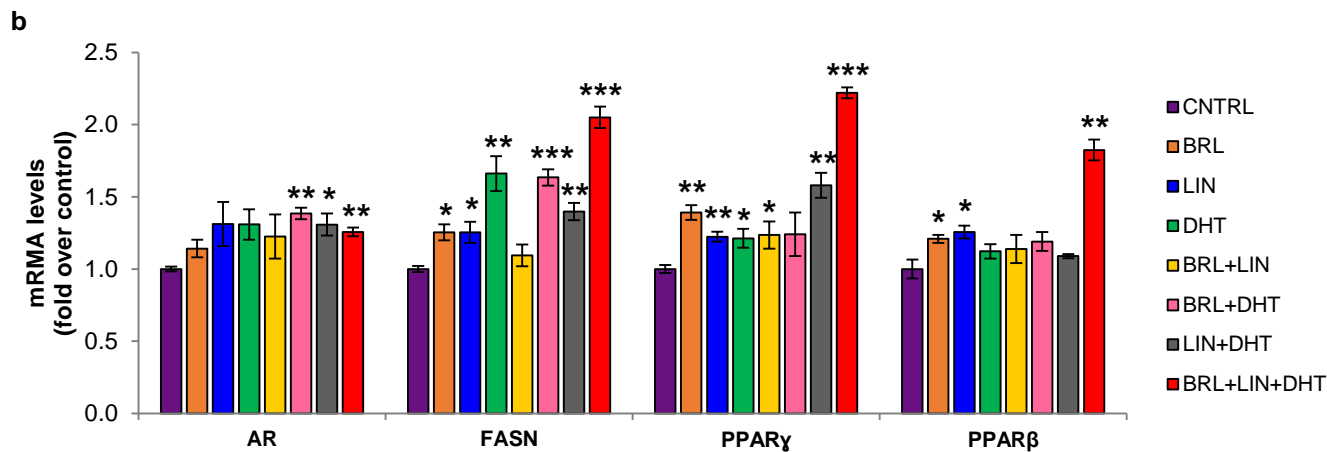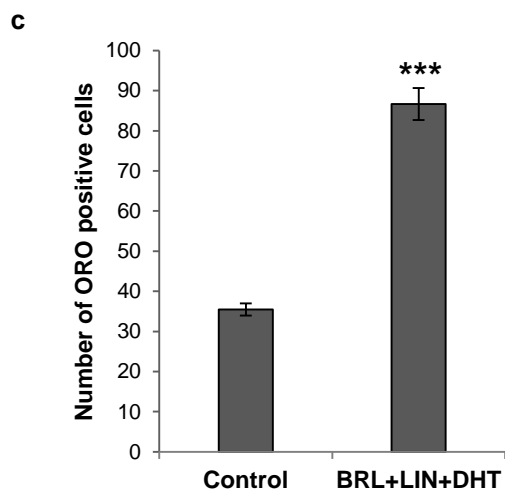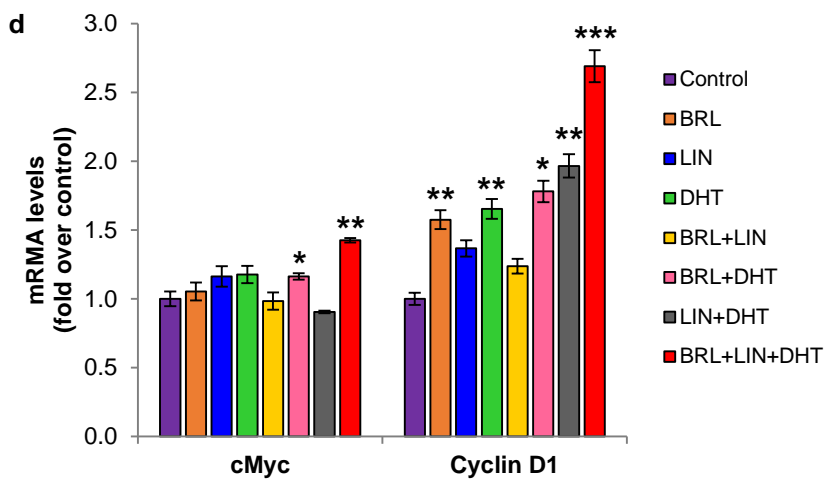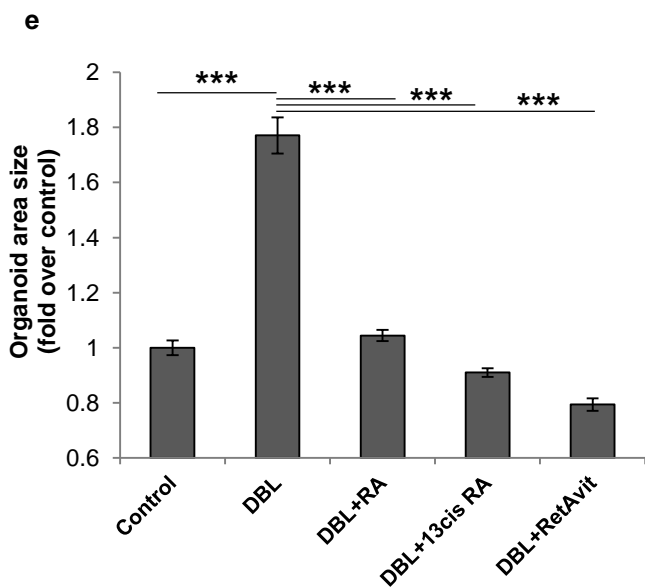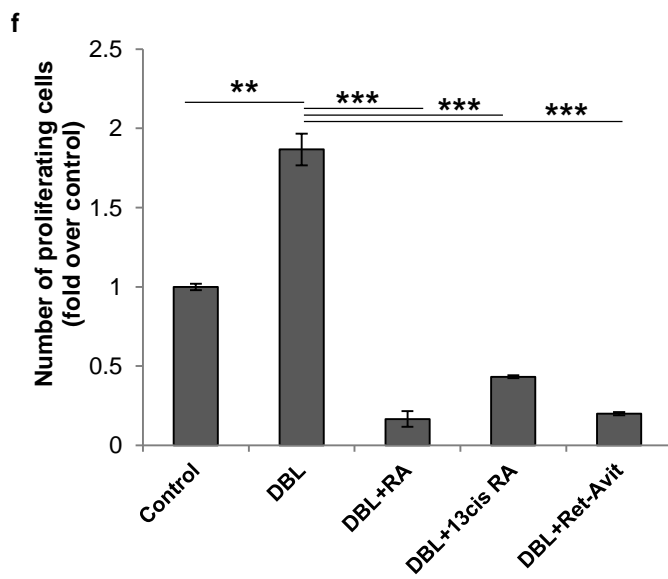

**Supplementary Figure 7. Sebaceous gland organoids can be used as a model for initial stages of acne vulgaris.** (a-d) *Blimp1*-YFP<sup>+</sup> cell-derived organoids cultured for seven days and treated for three days with 100 μM BRL-49653 (BRL), 100 μM Linoleic acid (LIN) or 100 μM Dihydrotestosterone (DHT), the combinations of them pairwise, all of them together or pure ethanol as control. (a) Statistical analysis of treated organoids size compared to control organoids [*n* = 150 organoids from 3 independent wells]. (b, c) Quantitative real time (RT)–PCR analysis of treated organoids. (b) mRNA levels of androgen receptor (AR), Fatty Acid Synthase (FASN), peroxisome proliferator-activated receptors gamma (PPAR-γ) and beta (PPAR-β) are significantly increased upon combined treatment (DBL). (c) Number of Oil red O (ORO)<sup>+</sup> cells in combined DBL treatment compared to control organoids [*n* = 120 individual organoids from 3 independent wells]. (d) mRNA levels of cMyc and Cyclin-D1 are significantly increased upon combined treatment. (e, f) *Blimp1*-YFP<sup>+</sup>-derived sebaceous gland organoids cultured for five days and treated for three days with a combination of DHT 10<sup>-5</sup>M, BRL 10<sup>-6</sup>M, LIN 10<sup>-4</sup>M (DBL), or pure ethanol as control, followed by treatments for three days with Retinoic acid (RA) 100 μM, 13-cis-Retinoic acid (13cis RA) 100 μM or Ret-Avit (Tretinoin 0.05% final 10 μM). (e) DBL-treated organoids display increased organoid size in comparison to control organoids, which is reduced upon treatments with Retinoic acid derivatives. [*n* = 120 individual organoids from 3 independent wells] (f) Number of Ki67<sup>+</sup> proliferating cells indicates increased proliferation in DBL-treated organoids, which is significantly reduced upon treatments with Retinoic acid derivatives [*n* = 60 individual organoids from 3 independent wells]. In RT-PCR experiments, changes in cycle threshold values were normalized to Rplp0 [*n* = 3 independent wells analyzed in triplicates]. Data show the mean relative to controls and error bars represent ±s.e.m. \**p*<0.05 \*\**p*<0.005, \*\*\**p*<0.001 as determined by two-tailed, unpaired Student's *t* test.

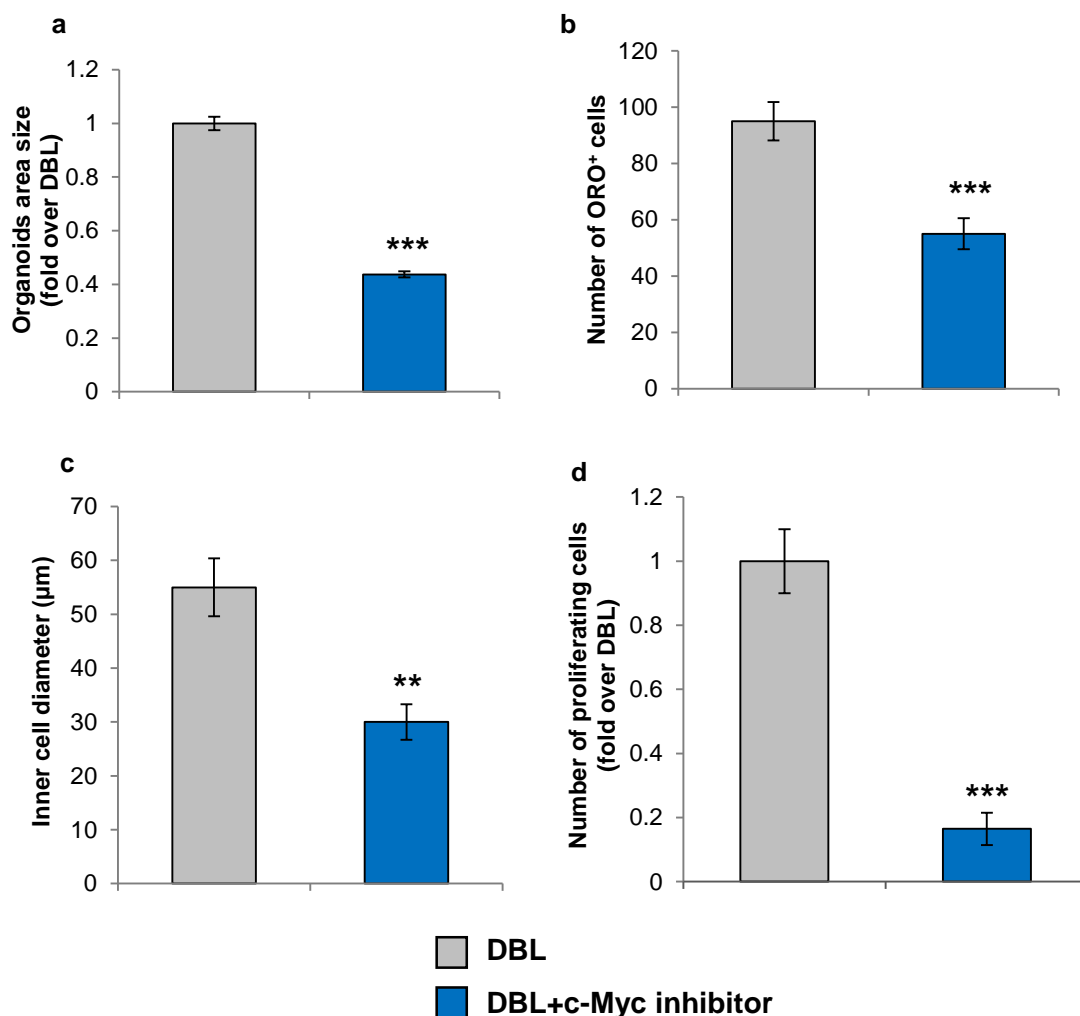

**Supplementary Figure 8. c-Myc inhibitor serves as a potential treatment for acne vulgaris.** (a-d) *Blimp1*-YFP<sup>+</sup> cell-derived sebaceous gland organoids cultured for five days and treated for three days with Dihydrotestosterone, BRL-49653 and Linoleic acid combination (DBL), following treatments for three days with c-Myc inhibitor 10058-F4. (a) Size of treated organoids compared to control organoids. (b) Number of Oil red O (ORO)<sup>+</sup> cells in c-Myc inhibited organoids compared to DBL-treated organoids. (c) Analysis of treated and control organoids, measuring cell diameter of inner cells. (d) Number of Ki67<sup>+</sup> proliferating cells in c-Myc inhibitor-treated organoids compared to DBL-treated organoids, showing significant reduction upon treatments with the inhibitor. Data are represented as the mean, error bars show  $\pm$ s.e.m. [ $n = 120$  organoids from 3 independent wells]. Significance was determined using unpaired, two-tailed Student's *t* test, where \* $p$ <0.05 \*\* $p$ <0.005, \*\*\* $p$ <0.001.
